# Supplementary material
Source: publisher site journal article supplement (https://www.dovepress.com/article/supplementary_file/597038/597038%20Supplementary%20Material.docx)
Supplement: Supplementary file 1 [file 597038%20Supplementary%20Material.docx]

# **SUPPLEMENTAL MATERIAL S1**

## **PIHEP Study Questionnaire (English version)**

*Note. The questionnaire was originally administered in Vietnamese; the English translation is provided here for reference. Unless otherwise stated, all sleep-related symptoms, daytime consequences, anthropometric items, and comorbidities were captured as dichotomous (Yes/No) responses with a one-month recall window. The Insomnia Severity Index (ISI) used the standard two-week recall window per the validated instrument.*

## **SECTION A. Sociodemographic and Occupational Characteristics**

## *(Check an appropriate response)*

| # | Item | Response options |
| --- | --- | --- |
| **A1** | Age (years) | _____ |
| **A2** | Sex | Male □  Female □ |
| **A3** | Marital status | Single □  Married □  Divorced □  Widowed □ |
| **A4** | Healthcare profession | Physician □  Nurse □  Pharmacist □  Technician □  Other (specify): _____ |
| **A5** | Years of professional experience | _____ years |
| **A6** | Workplace setting | Tertiary general hospital □  Specialty hospital □  Traditional medicine hospital □  University-affiliated medical center □  Other (specify): _____ |
| **A7** | Work schedule | Daytime only □  Rotating shift □  Regular night shift □ |

## **SECTION B. Lifestyle — Stimulant Use**

*“Within the six hours before sleep, did you use any of the following? (Check all that apply)”*

**B1**. None □

**B2.** Tea or coffee □

**B3.** Alcohol □

**B4.** Cigarette □

**B5.** Watching TV/tablet/smart phone before go to bed/at bed □ __________min

**B6.** Doing sport before go to bed □ __________min

## **SECTION C. Self-Reported Insomnia (Primary Outcome)**

*Single-item self-report measure used as the primary case definition.*

In the past month, have you had habitual difficulty:

**C1.** Falling asleep? ☐ Yes ☐ No

**C2.** Staying asleep? ☐ Yes ☐ No

**C3.** Waking up too early? ☐ Yes ☐ No

## **SECTION D. Sleep-Related Symptoms**

*Each item: Yes/No, one-month recall, affirmative response indicating habitual occurrence (on most nights of the week).*

| # | Item | Response |
| --- | --- | --- |
| **D1** | Sleep-onset difficulty (difficulty initiating sleep) | Yes ☐  No ☐ |
| **D2** | Nocturnal awakenings | Yes ☐  No ☐ |
| **D3** | Early-morning awakening | Yes ☐  No ☐ |
| **D4** | Morning headache | Yes ☐  No ☐ |
| **D5** | Habitual snoring | Yes ☐  No ☐ |
| **D6** | Witnessed apneas reported by bed partner | Yes ☐  No ☐ |
| **D7** | Restless legs symptoms | Yes ☐  No ☐ |
| **D8** | Nightmares | Yes ☐  No ☐ |

## **SECTION E. Daytime Consequences**

*Each item: Yes/No, one-month recall, affirmative response indicating habitual occurrence on most days of the week.*

| # | Item | Response |
| --- | --- | --- |
| **E1** | Daytime sleepiness | Yes ☐  No ☐ |
| **E2** | Fatigue or low energy | Yes ☐  No ☐ |
| **E3** | Memory impairment | Yes ☐  No ☐ |
| **E4** | Concentration difficulties | Yes ☐  No ☐ |
| **E5** | Mood disturbance (irritability, low mood, anxiety) | Yes ☐  No ☐ |
| **E6** | Increased errors or accidents at work/trafic | Yes ☐  No ☐ |
| **E7** | Behavioral problems (hyperactivity, impulsivity, aggression) | Yes ☐  No ☐ |
| **E8** | Concern about sleep problem | Yes ☐  No ☐ |
| **E9** | Dissatisfaction with sleep | Yes ☐  No ☐ |

## **SECTION F. Anthropometric and Weight-Related Items**

| # | Item | Response |
| --- | --- | --- |
| **F1** | Self-reported recent weight gain | Yes ☐  No ☐ |
| **F2** | Self-reported obesity | Yes ☐  No ☐ |
| **F3** | Self-reported weight lost | Yes ☐  No ☐ |

## **SECTION G. Physician-Diagnosed Comorbidities**

*“Has a doctor ever told you that you have any of the following conditions? (Check all that apply.)”*

□ No

□ Hypertension

□ Diabetes mellitus

□ Cardiovascular diseases (coronary artery disease, heart failure, arrhythmia)

□ Chronic respiratory diseases (Asthma or COPD)

□ Psychiatric disorders (Anxiety or depression)

□ Other chronic conditions (specify): _____

## **SECTION H. Insomnia Severity Index (ISI) — Vietnamese validated version**

*Recall period: past 2 weeks. Each item rated 0–4. Total score range 0–28.* *Severity grading among self-reported insomnia cases: mild (8–14), moderate (15–21), severe (22–28).*

| # | Item | Response scale |
| --- | --- | --- |
| **H1** | Severity of difficulty falling asleep | No ☐  Mild ☐  Moderate ☐  Severe ☐  Very severe ☐ |
| **H2** | Severity of difficulty staying asleep | No ☐  Mild ☐  Moderate ☐  Severe ☐  Very severe ☐ |
| **H3** | Severity of problem with waking up too early | No ☐  Mild ☐  Moderate ☐  Severe ☐  Very severe ☐ |
| **H4** | Dissatisfaction with current sleep pattern | No ☐  Mild ☐  Moderate ☐  Severe ☐  Very severe ☐ |
| **H5** | Interference of sleep problem with daily functioning (e.g., daytime fatigue, ability to function at work, concentration, memory, mood) | No ☐  Mild ☐  Moderate ☐  Severe ☐  Very severe ☐ |
| **H6** | Noticeability of sleep problem to others in terms of impairing quality of life | No ☐  Mild ☐  Moderate ☐  Severe ☐  Very severe ☐ |
| **H7** | Level of worry/distress about current sleep problem | No ☐  Mild ☐  Moderate ☐  Severe ☐  Very severe ☐ |

## **SECTION I. Insomnia (Sleep difficulty) Duration**

| # | Item | Response options |
| --- | --- | --- |
| **I1** | Your sleep difficulty and associated daytime symptoms occurred at least three times per week | Yes ☐  No ☐ |
| **I2** | Your sleep difficulty and associated daytime symptoms occurred at least three months | Yes ☐  No ☐ |
| **I3** | Total sleep time (average) | _______ |
| **I4** | Total time in bed (average) | _______ |

**(THANK YOU FOR YOUR PARTICIPATION)**
